# Supplementary material
Source: PubMed Central journal article supplement (PMC9266509)
Supplement: sj-pdf-1-vdi-10.1177_10406387221102430.pdf [file sj-pdf-1-vdi-10.1177_10406387221102430.pdf]

**Supplemental Table 1.** Probe se

chicken 18S rRNA 1  
chicken 18S rRNA 2  
chicken 18S rRNA 3  
chicken 18S rRNA 4  
chicken 18S rRNA 5  
chicken 18S rRNA 6  
chicken 18S rRNA 7  
chicken 18S rRNA 8  
chicken 18S rRNA 9  
chicken 18S rRNA 10  
chicken 18S rRNA 11  
chicken 18S rRNA 12  
chicken 18S rRNA 13  
chicken 18S rRNA 14  
chicken 18S rRNA 15  
CK 28s rRNA 1  
CK 28s rRNA 2  
CK 28s rRNA 3  
CK 28s rRNA 4  
CK 28s rRNA 5  
CK 28s rRNA 6  
CK 28s rRNA 7  
CK 28s rRNA 8  
CK 28s rRNA 9  
CK 28s rRNA 10  
CK 28s rRNA 11  
CK 28s rRNA 12  
CK 28s rRNA 13  
CK 28s rRNA 14  
CK 28s rRNA 15  
CK 28s rRNA 16  
CK 28s rRNA 17  
CK 28s rRNA 18  
CK 28s rRNA 19  
CK 28s rRNA 20  
CK 28s rRNA 21  
CK 28s rRNA 22  
CK 28s rRNA 23  
CK 28s rRNA 24  
CK 28s rRNA 25  
CK 28s rRNA 26

CK 28s rRNA 27  
CK 28s rRNA 28  
CK 28s rRNA 29  
CK 28s rRNA 30  
CK 28s rRNA 31  
CK 28s rRNA 32  
CK 28s rRNA 33  
CK 28s rRNA 34  
CK 28s rRNA 35  
CK 28s rRNA 36  
CK 28s rRNA 37  
CK mito 2865 1  
CK mito 2865 2  
CK mito 2865 3  
CK mito 28654  
CK mito 2865 5  
CK mito 2865 6  
CK mito 2865 7  
CK mito 2865 8  
CK mito 2865 9  
CK mito 1662 1  
CK mito 1662 2  
CK mito 1662 3  
CK mito 1662 4  
CK pG728 1  
CK pG728 2  
CK pG728 3  
CK pG728 4

#### Bacterial sequences

16s rRNA conserved 1  
16s rRNA conserved 2  
16s rRNA conserved 3  
23s rRNA conserved 1  
23s rRNA conserved 2  
23s rRNA conserved 3  
23s rRNA conserved 4  
23s rRNA cons1967 1  
23s rRNA cons1967 2  
23s rRNA cons1967 3

Lactobacillus 16s 1325

Fpausnitzi deletion 1249  
O.rhintraceale 16s 1310  
Lactobacillus 16s 1186p  
Lactobacillus 16s 1063 probe  
Lactobacillus 16s 920 probe  
Lactobacillus 16s 800 probe  
Firmacutes 16s rRNA 28  
Firmacutes 16s rRNA 148  
Firmacutes 16s rRNA 229

Proteobacteria 16srRNA 1277  
Proteobacteria 16srRNA 1125  
Proteobacteria 16srRNA 1030  
Proteobacteria 16srRNA 8  
Proteobacteria 16srRNA 102  
Proteobacteria 16srRNA 372

Bacteroides 16s rRNA+1308 pro  
Bacteroides 16s rRNA+1378 pro  
Bacteroides 16s rRNA+1182 pro  
Bacteroides 16s rRNA+878 prob  
Bacteroides 16s rRNA+288 prob

Acinetobacter 16s rRNA+1480 p  
Acinetobacter 16s rRNA+1385 p  
Acinetobacter 16s rRNA+1055 p  
Acinetobacter 16s rRNA+888 p  
Acinetobacter 16s rRNA +233 p

Firmacutes 23s rRNA 3045 probe  
Firmacutes 23 rRNA 2850s probe  
Firmacutes 23s rRNA 2730 probe  
Firmacutes 23sRNA 2610 probe  
Firmacutes 23srRNA 2490 probe  
Firmacutes 23srRNA 2204 probe  
Firmacutes 23srRNA 2115 probe  
Firmacutes 23srRNA 1976 probe  
Firmacutes 23srRNA 1825 probe  
Firmacutes 23srRNA 1491 probe  
Firmacutes 23s rRNA 1398 probe  
Firmacutes 23srRNA 1256 probe  
Firmacutes 23srRNA 1148 probe  
Firmacutes 23srRNA 933 probe

Firmacutes 23srRNA 604 probe  
Firmacutes 23srRNA 3 probe

Proteobacter 23srRNA 2878  
Proteobacter 23srRNA 2757  
Proteobacter 23srRNA 2637  
Proteobacter 23srRNA 2529  
Proteobacter 23srRNA 2429  
Proteobacter 23srRNA 2222  
Proteobacter 23srRNA 2094  
Proteobacter 23srRNA 1952  
Proteobacter 23srRNA 1801  
Proteobacter 23srRNA 1463  
Proteobacter 23srRNA 1363  
Proteobacter 23srRNA 1149  
Proteobacter 23srRNA 1055  
Proteobacter 23srRNA 913  
Proteobacter 23srRNA 784  
Proteobacter 23srRNA 663  
Proteobacter 23srRNA 488  
Proteobacter 23srRNA 237  
Proteobacter 23srRNA 14

Actinobacter 23s rRNA 3136  
Actinobacter 23s rRNA 2897  
Actinobacter 23s rRNA 2777  
Actinobacter 23s rRNA 2657  
Actinobacter 23s rRNA 2546  
Actinobacter 23s rRNA 2363  
Actinobacter 23s rRNA 2243  
Actinobacter 23s rRNA 2084  
Actinobacter 23s rRNA 1930  
Actinobacter 23s rRNA 1485  
Actinobacter 23s rRNA 1381  
Actinobacter 23s rRNA 1205  
Actinobacter 23s rRNA 1079  
Actinobacter 23s rRNA 957  
Actinobacter 23s rRNA 837  
Actinobacter 23s rRNA 697  
Actinobacter 23s rRNA 554  
Actinobacter 23s rRNA 189  
Actinobacter 23s rRNA 30

quences for depleting host and bacterial rRNA reads in poultry samples in conjunction with customized RNAs

TAA TGA TCC TTC CGC AGG TTC ACC TAC GGA AAC CTT GTT ACG ACT TTT ACT TCC TCT  
ATC CGA GGA CCT CAC TAA ACC ATC CAA TCG GTA GTA GCG ACG GGC GGT GTG TAC AA  
ATA ATT GCA ATC CCC GAT CCC CAT CAC GAA TGG GGT TCA ACG GGT TAC CCG CGC CT  
GGC ATC ACA GAC CTG TTA TTG CTC AAT CTC GGG TGG CTG AAC GCC ACT TGT CCC TCT  
ATC GGA ATT AAC CAG ACA AAT CGC TCC ACC AAC TAA GAA CGG CCA TGC ACC ACC AA  
CGT GTT GAG TCA AAT TAA GCC GCA GGC TCC ACT CCT GGT GGT GCC CTT CCG TCA AT  
TGC CCG GCG GGT CAT GGG AAT AAC GCC GCC GGA TCG CGA GTC GGC ATC GTT TAT GC  
TTC TTG GCA AAT GCT TTC GCT TTA GTT CGT CTT GCG CCG GTC CAA GAA TTT CAC CTC  
AAA ATA GAA CCG GAG TCC TAT TCC ATT ATT CCT AGC TGG AGT ATT CCG GCG GCC AG  
GCA TCG AGG GGG CGC CGA GAG ACA GGG GCT GGG ACA GGC GGT AGC TCG CCT CGC C  
CTA TTG GAG CTG GAA TTA CCG CGG CTG CTG GCA CCA GAC TTG CCC TCC AAT GGA TC  
TTT TCG TCA CTA CCT CCC CGG GTC GGG AGT GGG TAA TTT GCG CGC CTG CTG CCT TCC  
GGT CAC CAT GGT AGG CAC AGA CAG TAC CAT CGA AAG TTG ATA GGG CAG ACA TTC G  
GGC GAG CCC GGG TTG GTT TTG GTC TGA TAA ATG CAC GCG TCC CCG GAG GTC GGC GC  
GGA ACC ATA ACT GAT TTA ATG AGC CAT TCG CAG TTT CAC TGT ACC GCC CGT GTG TA  
GACAAAAGCTTGTGTCGAGGGCTGACTCTCAATAGATCGCAGCGAGGGAGCTGCTCTGCTAC  
ACGAACATGCGGTACGCGGCGGGGGAGAGGGCGGCGCCACATCTGTCCGCGCTCCGGTCCCGA  
GAGCCCACCGAGGCGCCTCGGCGCTGCGGTATCGCTACGTTTAGGGGGGATTCTGACTTAGAA  
ACATACACCAAATGTCTGAACCTGCGGTTCCCTCTCGTACTGAGCAGGATTACTAGCGCAACA  
TTCCCTATTAGTGGGTGAACAATCCAACGCTTGGTGAATTCTGCTTCACAATGATAGGAAGAC  
GTTATCCCTGTGGTAACTTTTCTGACACCTCCTGCTTAAAACCCAAAAAGTCAGAAGGATCGT  
GCCCTTCTGCTCCACGGGAGGTTTCTGGCCTCCCTGAGCTCGCCTTAGGACACCTGCGTTACG  
GTCGCGCCCCGGCGCGCGCCGGGCGCTTGGCGCCAGAAGCGAGAGCCCCTCGGGGCTCGCCCC  
GGCCGCGGCGCGGGTTCGCGCGACCGCGGGGCTCCCACTTATTCTACACCTCTCATGTCTCTT  
AAGCCCGTTCCCTTGGCTGTGGTTTCGCTGGATAGTAGATAGGGACAGTGGGAATCTCGTTCA  
ATAGTTACTCCCGCCGTTTACCCGCGCTTCATTGAATTTCTTCACTTTGACATTCAGAGCACTG  
ATTAACAGTCGGATTCCCCTGGTCCGCACCAGTTCTAAGCCGGCTGCTAGGCGCCGGCCGAC  
GCGGGCCCCCCCCCGCCGCCGCGCGCCCGCGGCCGCCGCCGCCGCCCGCCCTCGCGCCCTCGCG  
AGCGGGGGGGCGGAGGGGCAAGGAGGGGGGCGAGCGGCCGCCGCCGCCGCCCGCCCTCGCG  
CCCCCGGCGCCCCGGCGAGCGGGAGCGGGGAAAGGGGGGGCGGGGGCGGGCGGCCTCGT  
GAGCCAATCCTTATCCCGAAGTTACGGATCCGGCTTGCCGACTTCCCTTACCTACATTGGTCC  
GCGAGATTTACACCCTCTCCCCGGATTTTCACGGGCCAGCGAGAGCTCACCGGACGCCGCC  
CGCCCGGCCCTTACAAAGAAAAGAGAACTCTCCCCGGGGCTCCCGCCGGCTTCTCCGGGAT  
GGATCTGAACCCGACTCCCTTTTCGATCGGCTGAGGGCAACGGAGGCCATCGCCCGTCCCTTC  
TGGAACCCTGCTCCACTTCGGCCTTCAAAGCTCTCGTTTGAATAGTTGCTACTACCACCAAGA  
GCGGCCCTCCTACTCGTCGCGGCGTAGCCCCCGCGGCTCCGCACCGCCGGCGACGGCCGGGT  
TGTTACACACTCCTTAGCGGGTTCGACTTCCATGGCCACCGTCCTGCTGTCTAGATCAACCA  
TTCATCCCGCAGCGCCAGTTCTGCTTACCAAAGTGGCCCACTGAGCGCTCGCATTCCACGGC  
AGATCGTTTTCGGCCCCAAGACCTCTAATCATTTCGCTTTACCGGGTAAACTGCACCGCCGCC  
TTAGTCTTTTCGCCCTATAACCGGGTTCGGACGACCGATTTGCACGTCAGGACCGCTACGGAC  
TCCTAGCACGCGCGCTCATGCTCCACCTCCCCGGCGAGGCGGGCGAGACGGGCCGGTGGTGC

CTCACCTTCATTGCGCCGCGGGCTTTCGCGCGAGCCGCCGACTCGCGCGCGTGCTAGACTCCT  
GCCCTGGCGTGGCCCGAGCCCGGCCCGCGCGCCGCGCGGTTCGGGGCGCACTGAGCGCAGT  
CCCCGCGGGAACGGAGGCGGCCCGAACAGAAGGGGGAAGGTTCCCCCGGCGCCCCCGC  
GCGCCGGACACCCGACCCCCCGCCCCGCGCCCCGGGACGGACCCGGGGCGGGGAACGG  
CGACGCCGGTCCGGCCGCGGGGGGCCCTCCGGGGGGCCGCCCCCTCCGGGGGAGGGCGCGG  
ACCCGGCGGCCGCTCGCGCGGCCGCGGGCCACCTGCCCGCCGGCAGCCCTTCCCAGCCGTCC  
GGCCGGGCGGCGGTCCCCGGCCCGCCCGCCCCCTGGGCCCGCCCGCCCGGCGAAGGGC  
CCCGCCGGGTTGAATCCTCCGGGCCGACTGCGCGGACCCACCCGTTTACCTCTTAACGGTTT  
TTGGCTATCGGTCTCGTGCCGGTATTTAGCCTTAGATGGAGTTTACCACCCGCTTTGGGCTGC  
CCGGCCTCACACCGTCCGCGGGCTGGGCCTCGATCAGAAGGACTTGGGCCCCCCGAGAGCGG  
TTCGGCGCTGGGCTCTTCCCTCTTCACTCGCCGTTACTGAGGGAATCCTCGTTAGTTTCTTTCC  
GTTCTTGGCAGTTGAGTTGTATTGCTTAGAAGGTTGGGGTGTGCTCAGTGGTATTGACC  
GGATTGCTCCGGTCTGAACTCAGATCACGTAGGACTGTTAATCGTTGAACAAACGAACCTTA  
TCGATATGGGCTCTTGGAGGAGATTGCGCTGTTATCCCTGGGGTAGCTTGGTCCATTGCTCAA  
TGGTCTGTGGGTTTGGAGGATTTTTTTTTCTCCAAGGTCGCCCAACCGAAAAATGTCGACCA  
TTTTAAAGTTCCACAGGGTCTTCTCGTCTTATGTTTACATTCTCGTTTTTGCACGGGAATACTA  
TCTCAATTTACGGGACAATTGATTGCGCTACCTTCGCACGGTTAGGATACCGCGGCCGTTGAA  
GTTTTTGGGAAACAGTCGGGTCTTTGGTTTGCCGAGTTCCTTCTGTAGGTTTTAATCATCCTGT  
GGGTATAAGTTGAGTTCTGTTAATAATGTATTAATGTAAGTTTACGCCGTAGGAGGATAGGTT  
TGAGGGAGTCAAATAGGGTTTTAGATTTTTTAATGAGGGAGCTTTGACGCACTCTTTTGTGG  
GGTATGATCCACTTTACTGCTAAATCCTCCTTCTAAGGGCGGGTTTCACGTCCTTTTTCGTTTG  
GTCTTATTAGCGAGGGGCTATTGAGCTCACTGTTGTTCTTTCATTAGAGGTGGGCTGGCGACG  
TAGAACAGGCTCCTCTAGGTGGGTTTGGGGCACCGCCAAGTCCTTAGAGTTTTAAGCGTTTGT  
ATTTAGGGCTAGGCATAGTGGGGTATCTAATCCCAGTTTGGGTCTAGCTTTTCGTGGGTTAAA  
ATTTTTGCTAAAGCGGGATTGCTTAGAGAAAAGCGTGATTTTCGGGTAAATGGGATTTGCGA  
TAAATGGGTATTCTCGAAGAGAAAACGCGTGATTTTCGGTTAAATGGGGATTTCGCGAAGAGA  
TGGGGGATTTGCGAAGAGAAAACGCGTGATTTTCGCTTAAATGGGGGATTCTCGAAGAGGAA  
GGGGATTCTCGAAGAGAAAACGCGTGATTTTCGCTTAAATGGGGGATTCTCGAAGAGGAAAC

TCCTCCCCGCTGAAAGTACTTTACAACCCGAAGGCCTTCTTCATACACGCGGCATGGCTGCAT  
GTGTGGCTGGTCATCCTCTCAGACCAGCTAGGGATCGTCGCCTAGGTGAGCCGTTACCCACCC  
TATGCGGTATTAGCTACCGTTTCCAGTAGTTATCCCCCTCCATCAGGCAGTTTCCCAGACATTA  
TCCCACATCGTTTCCACTTAACCATGACTTTGGGACCTTAGCTGGCGGTCTGGGTTGTTTCCC  
ATTCTCCGGTATTCGCAGTTTGCATCGGGTTGGTAAGTCGGGATGACCCCTTGCCGAAACAG  
TCGGGGAGAACCAGCTATCTCCCGGTTTGATTGGCCTTTCACCCCCAGCCACAAGTCATCCGC  
ACCTTCAACCTGCCCATGGCTAGATCACCGGGTTTCGGGTCTATACCCTGCAACTTAACGCC  
ATTGCACTAACCTCCTGATGTCCGACCAGGATTAGCCAACCTTCGTGCTCCTCCGTTACTCTT  
CGGGTCCACGTTAGAACATCAAACATTAAGGGTGGTATTTCAAGGTCGGCTCCATGCAGAC  
GTCAAGCTATAGTAAAGGTTACGGGGTCTTCCGTCTTGCCGCGGGTACACTGCATCTTCAC

TCC ATG GTG TGA CGG GCG GTG TGT ACA AGG CCC GGG AAC GTA TTC ACC GCG GCA TC

CTC ATG GTG TGA CGG GCG GTG TGT ACA AGG CCC GGG AAC GTA TTC ACC GCA GCA TC  
TAG GCA GCT CCT TTC GGT CAC CGA CTT CAG GTA CCC CCA GCT TCC ATG GCT TGA CGC  
ACG GCT TTA AGA GAT TCG CTT GCC TTC GCA GGC TCG CTT CTC GTT GTA CCG TCC ATT  
TTG TCA CCG GCA GTC TCA TTA GAG TGC CCA ACT TAA TGC TGG CAA CTA ATA ACA AG  
TCC TAA TCT CTT AGG TTG GCA CTA GAT GTC AAG ACC TGG TAA GGT TCT TCG CGT TGC  
CTT GCG GTC GTA CTC CCC AGG CGG AGT GCT TAA TGC GTT AGC TGC AGC ACT GAG AG  
CGACTTGCATGTATTAGGCACGCCGCCAGCGTTCGTCCTGAGCCAGGATCaAActctc  
TATcCGGTATTAGCAcCtGTTTCCAAGtGTTATCCCCgTCTtatGGGCAGGTTACCCACGTGTTACT  
GTCTCAGTCCCAATGTGGCCGATCACCTCTCAGGTTCGGCTATGCATCGTCGCCTTGTTGAGC

AAG GCC CGG GAA CGT ATT CAC CGT GGC ATT CTG ATC CAC GAT TAC TAG CGA TTC CG  
TGT ATG CGC CAT TGT AGC ACG TGT GTA GCC CTG GTC GTA AGG GCC ATG ATG ACT TG  
GGG TTG CGC TCG TTG CGG GAC TTA ACC CAA CAT TTC ACA ACA CGA GCT GAC GAC AC  
AGCAAGCTTCCCCTGGTACCGTTCGACTTGCATGTGTTAGGCCTGCCGCCAGCGTTCAATCTG  
TATGCGGTATTAGCcACcGTTTCCAgtGTTATCCCCCaCcAtaAGGCAGATTCCCAtGCATTACTC  
CCCCTGCTGCCTCCCGTAGGAGTCTGGGCCGTGTCTCAGTCCCAGTGTGGCTGATCATCCTC'

CAT GGC TGA TAT GCG ATT ACT AGC GAT TCC AGC TTC ACG GAG TCG AGT TGC AGA CT  
CTT CAG GTA CCC CCA GCT TCC ATG GCT TGA CGG GCG GTG TGT ACA AGG CCC GGG AA  
GCT GCC CTC TGT ACC TAC CAT TGT AGC ACG TGT GTA GCC CAG GAC GTA AGG GCC GT  
GGT AAG GTT CCT CGC GTA TCA TCG AAT TAA ACC ACA TGC TCC ACC GCT TGT GCG GG  
CCA ATA TTC CTC ACT GCT GCC TCC CGT AGG AGT CTG GTC CGT GTC TCA GTA CCA GTC

CCA GCC GCA CCT TCC GGT ACG GCT ACC TTG TTA CGA CTT AGT CCC AAT CGC CAG TCC  
GGT TGG GCC ACC GGC TTC GGG TGT TAC CGA CTT TCG TGA CTT GAC GGG CGG TGT GT  
GGC AGT CTC CCA TGA GTC CCC ACC ATA ACG TGC TGG CAA CAT AGG ACG AGG GTT GC  
ATG TCA AGC CTT GGT AAG GTT CTT CGC GTT GCA TCG AAT TAA TCC GCA TGC TCC GCC  
GTA GGA GTC TGG GCC GTG TCT CAG TCC CAG TGT GGC CGG TCG CCC TCT CAG GCC GG

TTG GTT AAG TCC TCG ACC GAT TAG TAT TGG TCC GCT CCA TGC ATC ACT GCA CTT CCA  
CCA TAC ATA GCT ACC CAG CGA TGC TCC TGG CGG AAC AAC TGG TAC ACC AGC GGT AC  
GGG ACC GAA CTG TCT CAC GAC GTT CTG AAC CCA GCT CGC GTA CCG CTT TAA TGG GC  
AAC CTC CCC GTC GAT GTG AAC TCT TGG GGG AGA TAA GCC TGT TAT CCC CAG GGT AG  
CCC TGC TCG ACT TGT CGG TCT CGC AGT CAA GCT CCC TTA TGC CTT TAC ACT CTG CGA  
TCA ATA TCA AGC TAC AGT AAA GCT CCA TGG GGT CTT TCC GTC CTG TCG CGG GTA AC  
CCT TTC GTG CGG GTC GGA ACT TAC CCG ACA AGG AAT TTC GCT ACC TTA GGA CCG TL  
TCT TAA CCT TCC AGC ACC GGG CAG GCG TCA GCC CCT ATA CGT CAT CTT ACG ATT TTC  
AGC ACC CCT TCT CCC GAA GTT ACG GGG TCA TTT TGC CGA GTT CCT TAA CGA GAG TTC  
GTA CAG GAA TAT CAA CCT GTT ATC CAT CGC CTA CGC CTN TCG GCC TCG GCT TAG GT  
TTT CGC TAC TCA TAC CGG CAT TCT CAC TTC TAA GCG CTC CAC CAG TCC TCA CGG TCT  
CCA CAG CTT CGG TAA TAT GTT TAG CCC CGG TAC ATT TTC GGC GCA GGG TCA CTC GA  
GCA ACT CCA CAT CCT TTT CCA CTT AAC ATA TAT TTT GGG ACC TTA GCT GGT GGT CTG  
CGA GGC TAG CCC TAA AGC TAT TTC GGA GAG AAC CAG CTA TCT CCA AGT TCG TTT GG

TTG TAG GCA CAC GGT TTC AGG TTC TAT TTC ACT CCC CTT CCG GGG TGC TTT TCA CCT  
TGG GTT CCC CCA TTC GGA AAT CTC CGG ATC AAA GCT TAC TTA CAG CTC CCC GAA GC

GGGAGAACTCATCTTGAGGCGAGTTTCcCGCTTAGATGCTTTCAGCGgTTATCTCTTCCGCACT  
CCGGTCTCTCGTACTAGGAGCAGCCCCCTCAATTCTCCAACGCCACGGCAGATAGGGAC  
CATAACCTTGGGACCTACTTCAGCCCCAGGATGTGATGAGCCGACATCGAGGTGCCAAACAC  
CCGTTGAGCGATGGCCCTTCCATTCAGAACCACCGGATCACTATGACCTACTTTCGTACCTGC  
GATGTCCGACCGTGCTTAGCCAACCTTCGTGCTCCTCCGTTACTCTTTGGGAGGAGACCGCCC  
TTCAAAGCCTCCCACCTATCCTACACATCAA AATTCAATGTTTCAGTGTCAAGCTATAGTAAAG  
TTTCACTGAGTCTCGGGTGGAGACAGCGTGGCCATCGTTACGCCATTCGTGCAGGTTCGGAAC  
ACCCATCAATTAACCTTCCGGCACCGGGCAGGCGTCACACCCTATACGTCCACTTTCGTGTT  
CCTTCTCCC GAAGTTACGGTGCCATTTTGCCTAGTTCCTTCACCCGAGTTCCTCAAGCGCCTT  
GGAATATTAACCTGTTTCCCATCGACTACGCCTTTCGGCCTCGCCTTAGGGGCCGACTCACCC  
CGCTTTATCGTTACTCATGTCAGCATTTCGCACTTCTGATACCTCCAGCATGCCTCACAACCCAC  
TTAGCCCCGTTACATCTTCCGCGCAGGCCGACTCGACCAGTGAGCTATTACGCTTTCTTTAAA  
CACTTAACCATGACTTTGGGACCTTAGCTGGCGGTCTGGGTTGTTTCCCTCTTCACGACGGAC  
GGTATTCGGAGTTTGCATCGGGTTGGTAAGTCGGGATGACCCCTAGCCGAAACAGTGCTCT/  
GCCTTTCACCCCTAGCCACAAGTCATCCGCTAATTTTCAACATTAGTCGGTTCGGTCCCTCAC  
CGCCCTATTAAGACTCGGTTTCCCTTCGGCTCCCCTATTCGGTTAACCTTGCTACAGAATATA/  
CTCCC ACTGCTTGTACGCACACGGTTTCAGGTTCTATTTCACTCCCCTCGCCGGGGTTCTTTTC  
GGCTGCTCCCCGTTTCGCTCGCCGCTACTGGGGGAATCTCGGTTGATTTCTTTTCTCGGGGTAC  
TGGGTTTCCCCATTTCGGACATCGCCGGATCAAACGCTTCTTGTACGCTCCCCGACGCTTTTCG

GGAAACCTCATCTTGAAGCAGGCTTCCCGCTTAGATGCTTTCAGCGGTTATCCCTTCCGAACG  
CGGTCCTCTCGTACTAGGGACAGCCCTTCTCAAGTTTCTTACGCGCGCAGCGGATAGGGACCC  
CAACCCTTGGGACCTACTCCAGCCCCAGGATGCGACGAGCCGACATCGAGGTGCCAAACCAT  
CGTTGAGCGACGGCGCTTCCACAAGCCACCGCCGGATCACTAGTCCCGACTTTCGTCCCTGCT  
CCAACCAGGCTGAGGGAACCTTTGGGCGCCTCCGTTACATTTTAGGAGGCAACCGCCCCAGT  
GCTTCACAGTCTCCACCTATCCTACACAAGCCGACCCGAACACCAATACCAAGCTATAGTA/  
ATTTCCGCGAGTTCGTGGTTGAGACAGCGGAGAAGTCGTTACGCCATTCGTGCAGGTTCGGA  
ACCGGTCTCTAACCTTCCAGCACCGGGCAGGCGTCAGTCCGTATACATCGTCTTACGACTT  
GGCCCCCTTCTCCC GAAGTTACGGGGGCATTTTGCCGAGTTCCTTAACCACGATTCTCTCGA  
CCGGTACGGGAATATCAACCCGTTGTCCATCGACTACGCCTGTCCGGCCTCGCCTTAGGTCCCG  
TTCTCACCCGCTTTTCGCTACTCATGCCTGCATTCTCACTCGTGTAGCCTCCACCACTGGGTCA  
TGCCACAGCTTCGGCGGTGTGCTT GAGCCCCGCTACATTGTCCGGCGCGGAATCACTTGACCAC  
GCAACTCCACATCCTTTCCCACTTAGCACACGCTTAGGGGCTTAGCTGGTGATCTGGGCTGT  
CGGCATTCGGAGTTTGGCTGACGTCAGTAACCTGGTAGGGCCCATCGGCCATCCAGTAGCTCT  
ATCACGGAGTTTGATTGGCCTTTCACCCCTACCCACAGCTCATCCCCTCAGTTTTTCAACCTAAC  
GAACACGCGACTCAAACGCCCTATTCGGACTCGCTTTCGCTACGGCTACCCACACGGGTTA/  
GGCTCCGACGGATTGTAGGCACACGGTTTCAGGTA CTATTTCACTCCCCTCCCGGGTACTTT  
GGTTTAGCCTCATCCGCTTTCGCTCGCCACTACTCACGGAATCACTATTGTTTTCTTCTTCTG  
CCCATTTCGGACATCCTCGGATCACAGCTCGTTTGCCA ACTCCCCGAGGCTTATCGCAGGCTNC



ase H protocol. Shaded probes are included in the conserved "custom A" treatment, whereas the "c

AGA TAG TCA AGT TCG ACC GTC TTC TCG ACG CTC CGG CAG GGC CGT GGC CGA  
AA GGG CAG GGA CTT AAT CAA CGC GAG CTT ATG ACC CGC ACT TAC TGG GAA TT  
G CCG GCG TAG GGT AGA CAC AAG CTG AGC CAG TCA GTG TAG CGC GCG TGC AC  
T AAG AAG TTG GAC GCC GAC CGC TCG GGG GTC GCG TAA CTA GTT AGC ATG CC/  
CC CAC GGA ATC GAG AAA GAG CTC TCA ATC TGT CAA TCC TGT CCG TGT CCG GC  
T CCT TTA AGT TTC AGC TTT GCA ACC ATA CTC CCC CCG GAA CCC AAA GAC TTG  
BT CGG AAC TAC GAC GGT ATC TGA TCG TCT TCG AAC CTC CGA CTT TCG TTC TTG  
TAG CGG CAC AAT ACG AAT GCC CCC GGC CGT CCC TCT TAA TCA TGG CCC CGT  
C CTG CTT TGA ACA CTC TAA TTT TTT CAA AGT AAA CGC TTC GGG CCC CGC GGG  
JGC GGA CCG CCA GCT CGA TCC CAA GAT CCA ACT ACG AGC TTT TTA ACT GCA G  
C TCG TTA AAG GAT TTA AAG TGG ACT CAT TCC AAT TAC AGG GCC TCG AAA GAC  
J TTG GAT GTG GTA GCC GTT TCT CAG GCT CCC TCT CCG GAA TCG AAC CCT GAT  
AA TGG GTC GTC GCC GCC ACG GGG GCG TGC GAT CGG CTC GAG GTT ATC TAG AC  
BT CGT CGG CAT GTA TTA GCT CTA GAA TTA CCA CAG TTA TCC AAG TAA CGG GAC  
C TTA GAC ATG CAT GGC TTA ATC TTT GAG ACA AGC ATA TGC TAC TGG CAG GAT  
GTACGAAACCCCGACCCAGAATCAGGTCGTCTACGAATGATTTAGCACCGGGTTCCCC  
ACCACGAGCGGCGCTCCGCACCGACCGCCCGCCGAGGGGGGCGGGCGGCCGGCTATC  
GGCGTTCAGTCATAATCCCACAGATGGTAGCCTCGCTCCAGTGGCTCCTCAGCCAAGC  
ACACATCATCAGTAGGGTAAAACCTGTCTCACGACGGTCTAAACCCAGCTCACG  
JCCGACATCGAAGGATCAAAAAGCGACGTCGCTATGAACGCTTGGCCGCCACAAGCC/  
GAGGCCCCCGCTTTCACGGTCTGTATTCGTA CTGAAAATCAAGATCAAGCGAGCTTTT  
CTTTGACAGGTGTACCGCCCCAGTCAAACCTCCCCACCTGACGCTGTCCCCGGAGCGG  
JCCCGCCTCACCGGGTAAGTGAAAAACGATCAGAGTAGTGGTATTTACCGGGCGGCC  
CACAGCGCCAGACTAGAGTCAAGCTCAACAGGGTCTTCTTTCCCCGCTGATTCCGCC  
ATCCATTCATGCGCGTCACTAATTAGATGACGAGGCATTTGGCTACCTTAAGAGAGTC  
JGGCAGAAATCACATCGCGTCAACACCCGCCGCGGGCCTTCGCGATGCTTTGTTTTA  
JGCGGGGGCGCCGGCCCCGGAGACCCCCCGCCGGGACCGCCCCGCCCCGGCGCCGCC  
GGGAGGGCGCTCGGGACGGGGGGCGGCCGGGACGACGGCCGACGGGAGGGGGCGCCG  
CACGGGAAGGGCCCGGCGCGGTCCAGAGTCGCCGCCGCCGCGCCGCCCGCTGACCC  
JCCAGCCGCGGCGCGCGCCAGCCCCGCTTCGCGCCCCAGCCCCAGCCGACCCAGCCCT  
AACATGCCAGAGGCTGTTACCTTGGAGACCTGCTGCGGATATGGGTACGGCCCCGGC  
JGAACCGCGACGCTTTCAAAGGCGCGGGCCCCCTCTCTCGGGGCGAACCCGTTCCAGG  
CGCTTGCGTTACCGCACTGGGCGCCTCGCGGGCGCCCGTCTCCGCCGCTCCGGATTCCG  
JGAACGGCGCTCGCCTATCGCTTAGGACCGACTGACCCATGTTCAACTGCTGTTTACA  
TCTGCACCTGCGGCGGCTCCACCCGGGCCCGCGCCCCAGGCTTCCAGGCGCACCGCA  
ATGGGCCCGACGCTCCAGCGCCATCCATTTTCAGGGCTAGTTGATTCGGCAGGTGAGT  
ACACCTTTTCTGGGCTCTGATGAGCGTCGGCATCGGGCGCCTTAACCCGGCGTTCCG  
JCCGGCTCCACGCCAGCGAGCCGGGCGTCTTACCCATTGAAAGTTTGAGAATAGGTTG  
JCGAGCGCCAGCTATCCTGAGGGAACTTCGGAGGGAAACCAGCTACTAGATGGTTTCGA  
JTCACCAGAGTTTCTCTGGCTTCGCCCTGCCAGGCATAGTTACCATCTTTCCGGG  
JGCCCCGGGGCCTTCCGGCCTGCCGCCCGGGATCCCACCTCAGCCGGCGCGCGCCGGC

TGGTCCGTGTTTCAAGACGGGTTCGGGTGGGTAGCCGACGTCGCCGCGGACCCCGGGC  
FCCGCCCCGGTTCGGACAGCGGCGCCGGGGGCCGGCGGGCCCCTCCCCGAACGGGCC  
GGCCTCGCCCCGCGCCGGGCTGGAGGCGCGGCCACACGCGCGGGCGCCGCGCCGAGCC  
AGAGAGAGCGAGCGGCGGCGTACGGCGGCGGCGGACGCGCGCGCGGGCGCGGCCG  
CGGCGGTCTCTCCCTCGGCCCGGGATTTCGGCGACGATCCGGGGCCCGGCGGCTATAA  
CGGAGCCGGTTCGCGGCGCACCGCCGCGGAGGAAATGCGCCCGACGGGGGCCGGACG  
GAGGGACGGAGGGGAGGCGGAGGCGGGGATCCGACGGCGCCCGCGCCGGCCGACCTT  
CACGCCCTCTTGAACCTCTCTTCAAAGTTCTTTTCAACTTTCCCTTACGGTACTTG  
ATTCCCAAGCAACCCGACTCCGAGAAGCCCCGGGCCCGGCGCGCCGGGGGGCCGCTA  
GCGCCGGGGATGGGGGCTTCCGTACGCCACACCTCCCGCGCCCCACCGCGGGGGCGGGG  
CTCCGCTGACTAATATGCTTAAATTCAGCGGGTTCGCCACGTCTGACCTGAGGTCGCG  
CCACTTCTCCGGTCCCTTCGTACTAGGAGGAGTGTGTCCATAGATAGAAACCGACCT  
AATAGCGGTTGCACCATTAGGTTGTCTGATCCAACATCGAGGTCGTAAACCTCCTTG  
TTATATTGGGTCTGGTACTGTTGGTACTTTGAGGAGTTGGTCTTAGTGAAGAGTTG  
GGGGTTTATGTGTGGGTGGACCCAGTGGGGCTGTGTAAGGTTGTAAGGTGGTCGTGA  
ATTCATAGATTACCTACAGGAGACAGTTAAGACCTCGTTTAGCCATTCATACAAG  
ACTTTGGGGTCACTGGGCAGGCATCACCTTCAATACTTGTTGTTAGCTGAAGGCTAT  
GGGCGCTCCTGGGTTGGCTTAACAGATTGAGGAATACGTATTGCTTGTTAGTGTGG  
CCAGATTACTCATTTTAGCATTGATTCTTCTATTGTCATAGGTTAACCTGCTTTGGT  
TGGCTGCTTGAAGGCCACAGTGCGGGGAGGGGTGATTATTATCCGCTGG  
TTCTATGTTAGAAAATGTAGCCATTTCTCCCACCCCATAGGCTATACCTTGACCT  
GCGGTATGTAGGCTGTGCTGGCAAGGGGTGGTTGGGTGAATCGTGGATTATCGATTA  
GCTCGTAGTTCTCAGGCGGATACATGTGTGATGGGAGGTATCTAG  
ATTAATCGTTGAGGCTAAGATGGATTTGGGTTGGGTTTAGGTGGATCT  
GAGAGAAANANGGATTTTTGCTTAAATGGGGATTTGCGAAGAGAAAACGCGTGATTTT  
AAACGCGTGATTTTCGCTTAAATGGGGGATTCTCGAAGAGAAAACGCGTGATTTTCG  
LACCCGTGATTGTCGCTTAAATGGGGGATTCTCAAAAAGAAAACGCATGATTTTCGCTI  
LCCGTGATTTTCGCTTAAATAGGGGATTCTTGAAGAGAAAACGCCTGATTTTCGCTTAA

CAGGCTTGCGCCATTGTGCAATATCCCCACTGCTGCCTCCCGTAGGAGTCTGGACC  
CTACTAGCTAATCCCATCTGGGCACATCCGATGGCAAGAGGCCCGAAGGTCCCCCTCT  
ACTCACCCGTCCGCCACTCGTCAGCAAAGAGCAAGCTTCTTCCTGTTACCGTTCGACTI  
CTCTTCACGACGGACGTTAGCACCCGCCGTGTGTCTCCCGTGATAAC  
GTGCTTACCCCCGGAGATGAATTCACGAGGCGCTACCTAAATAGCTT  
CTAATTTTTCAACATTAGTCGGTTCGGTCCCTCCAGTTAGTGTTACCCA  
GTTAAGACTCGGTTTCCCTTCGGCTCCCTATTCGGTTAACCTTG  
TAGGAGGAGACCGCCCCAGTCAAACCTACCCACCAGACACTGTCCGCAACCCGGATCA  
TGGCGTCCACACTTCAAAGCCTCCACCTATCCTACACATCAAGGCTCAATGTTTCAGT  
GAGCGAGTTCAATTTCACTGAGTCTCGGGTGGAGACAGCCTGGCCATCATTACGCCATT

3C TGA TCC GCG ATT ACT AGC GAT TCC AAC TTC GTG CAG GCG AGT TGC AGC CT

3C TGA TCT GCG ATT ACT AGC AAT TCC GAC TTC GTG CAG GCG AGT TGC AGC CT  
3 GCG GTG TGT ACA AGG CCC GGG AAC GTA TTC ACC GCA ACA TGG CTG ATT TGC  
7 GTA GCA CGT GTG TAG CCC AGG TCA TAA GGG GCA TGA TGA CTT GAC GTC ATC  
8 GTT GCG CTC GTT GCG GGA CTT AAC CCA ACA TCT CAC GAC ACG AGC TGA CG  
2 TTC GAA TTA AAC CAC ATG CTC CAC CGC TTG TGC GGG CCC CCG TCA ATT CCT  
8 G CGG AAA CCT CCC AAC ACT TAG CAC TCA TCG TTT ACG GCA TGG ACT ACC AG

ACCCCGTCCGCCACT

CGTTACCTACCAACTAGCTAATGCACCGCGGGTCCATCC

8A CTT CAT GGA GTC GAG TTG CAG ACT CCA ATC CGG ACT ACG ACG CAC TTT ATC  
A CGT CAT CCC CAC CTT CCT CCA GTT TAT CAC TGG CAG TCT CCT TTG AGT TCC  
3C CAT GCA GCA CCT GTC TC  
AGCCAGGATCAAACCTC  
ACCCGTCCGCCACTCG  
TCAGACCAGCTAgGGATCGTCGCCTTGGTGAGCCtTTACCCACCAACTAGCTAATC

CCGA TCC GAA CTG

AC GTA TTC ACC GCA T

AG ATG ACT TGA CGT CAT CCC CAC CTT CCT

C CCC CGT CAA TTC CTT TGA GTT TCA TTC TTG CGA ACG TAC TCC CCA GGT GG

3 TGG GGG ATC ACC CTC TCA GGA CCC CT

C CAC CTT CGA CGG CTC CCT CCC

A CAA GGC CCG GGA ACG TAT TCA CCG CAG CGT TG

CG CTC GTT GCG GGA CTT AAC CCA ACA TCT CAC GAC ACG AGC TGA CGA CAA CC

C GCT TGT GCG GGC CCC CGT CAA TTC CTT TGA GTT TTA GCC TTG CGG CCG TAC T

8C TAC CCG TCG TCG CCT TGG TAG GCC ATT ACC CCA CCA ACA AGC TGA TAG GCC

A CTT CCA ACC TAT CTA CCT CAT CAT CTC TGA GGG GTC TTA C

CG TCC ATC CCG GTC CTC TCG TAC TAA GGA CAG CTC CTC TCA AAT TTC CTA CGC

8G AAC AGC CCA ACC CTT GGG ACC GAC TAC AGC CCC AGG ATG CGA TGA GCC GA

8C TTT TAT CCG TTG AGC GAT GGC CCT TCC ATG CGG AAC CAC CGG ATC ACT AAC

A ATG ATT TCC AAC CAT TCT GAG GGA ACC TTT GGG CGC CTC CGT TAC CCT TTA C

C TGC ATC TTC ACA GGT ACT ATA ATT TCA CCG AGT CTC TCG TTG AGA CAG TGC

A TAG TTA CGG CCG CCG TTT ACT GGG GCT TCA ATT C

3 CAG AGA CCT GTG TTT TTG ATA AAC AGT CGC TTG GGC CTA TTC ACT GCG GCT

C TCT CGC TCA CCT TAG GAT TCT CTC CTC GAC TAC CTG TGT CGG TTT GCG GTA C

C CCG ACT AAC CCT GGG CGG ACG AGC CTT CCC CAG GAA ACC TTA GTC ATT CGC

7 ANC TTC GCC GCC CTT AGA ACG CTC TCC TAC C

C TAG TGA GCT ATT ACG CAC TCT TTA AAT GGT GGC TGC TTC TAA GCC AAC ATC

8 GGC TGT TTC CCT TTC GAC TAC GGA TCT TAT CAC TCG CAG TCT GAC TCC CG

8A ATT TCA CCG CTA CCC ACA CCT CAT CCC CGC ACT TTT CAA CGT ACG TGG GTT

TTC CCT CAC GGT ACT GGT TCA CTA TCG GTC ACT AGG GAG TAT TTA GCC TTG G  
A TAT CGG NGT TAG TCA CGT CCT TCA TCG GCT CCT AGT GCC AAG GCA TCC ACC

TAGCTACCCGGCAATGCCACTGGCGTGACAACCGGAACACCAGTGGTGCGTCCACT  
CGAACTGTCTCACGACGTTCTAAACCCAGCTCGCGTACCACTTTAAATGGCGAACAGC  
CGCCGTCGATATGAACTCTTGGGCGGTATCAGCCTGTTATCCCCGGAGTACCTTTTAT  
TCGACTTGTCAGTCTCGCAGTCAAGCTGGCTTATGCCATTGCACT  
CAGTCAAACCTACCCACCAGACACTGTCC  
GTTTACCGGGGTCTTTCCGTCTAGCCGCGGGTACACTGCATCTTCACAGCGATTTCAA  
TTACCCGACAAGGAATTTTCGCTACCTTAGGACCGTTATAGTTACGGCCGCCGTTTACCC  
TGCAGAGTGCTGTGTTTTAATAAACAGTCGCAGCCACCTGGTATCTGCGACC  
TGGTATTCTCTACCTGACCACCTGTGTGCGGTTTGGGGTACG  
TGCCCCGATTAACGTTGGACAGGAACCCTTGGTCTTCCGGCGAGCGGGCTTTTCACC  
CTTCACAGGCTTACAGAACGCTCC  
TGATGGCTGCTTCTAAGCCAACATCCTGGCTGTCTAAGCCTTCCCACATCGTTTCC  
GTTAGCACCCGCCGTGTGTCTCCC  
ACCCCCGGAGGTGTTTGCACGAGGCGCTACCTAAATAGCTTTCGGGGAGAACCAGCTA  
TTAGTGTTACCCAACCTTCAACCTGCCCATGGCTAGATCACCGGGTTCGGGGT  
AGTCGCTGACCCATTATACAAAAGGTACGCAGTCAC  
GCCTTTCCTCACGGTACTGGTTCACTATCGGTCAGTCAGGAGTATTTAGCCTTGG  
CTTAGATGTTTCAGTTCCCCCGGTTTCGCCTC  
CAGACTAGCACGTCCTTCATCGCCTCTGACTGCCAAGGCATCCACCGTGTGCGCTTAG

TAGCCAACCAGCCGTGCTCCTGGCGGAACAACCTGGCACACCAGAGGTTTCGTCCGTCC  
GAACTGTCTCACGACGTTCTAAACCCAGCTCGCGTACCGCTTTAATGGGCGAACAGCC  
TGCCGTCGATATGGACTCTTGGGCAAGATCAGCCTGTTATCCCCGGGGTACCTTTTATC  
TCGACCTGTCAGTCTCACAGTCAAGCTCCCTTGTGCACTTAACTCGACACCTGATTG  
TAAACTACCCACCAGGCACTGTCCCTGATCCGGATCACGGACCGAGGTT  
AAGGTCCCAGGGGTCTTTCCGTCTGCTGCGCGTAACGAGCATCTTTACTCGTAGTGCA  
CTTACCCGACAAGGAATTTTCGCTACCTTAGGATGGTTATAGTTACCACCGCCGTTTAC  
CGCACGGACCTGTGTTTTAGTAAACAGTCGCTTCTCCCTGGTCTCTGCGGCC  
TCGCCTTGGTATTCTCTACCTGACCACCTGAGTCGGTTTGGGGTACGGGCGG  
TACTTACCCAGGGCGGATTAACCTGGCCCTGGAACCCTTGGTTCATTCGGCGGACGGGT  
CCCCGCCGCTTACCCGCCACACGACGCTCCCTACCCA  
TTGAGCTATTACGCACTCTTTCAAGGGTGGCTGCTTCTAAGCCAACCTCCTGGTTGTC  
TTCCTCTCGACTACGAAGCTTATCCCCGCGAGTCTCACTGCCGCGCTCTCACTTAC  
TACCTCCGGCAAGAAACACGCGACGCTGCACCTAAATGCATTTCCGGGGAGAACCAGCT  
TTGGGTTCCGGTCTCCACGCGGTCTTACCCGCGCTTCAACCTGGCCATGGGTTAGATC  
ACCTCGCCACGTACCACTAACTCGCAGGCTCATTCTTCAAAGGCACGCCGTCACCCC  
TCACCTTTCCTCACGGTACTTGTCCGCTATCGGTCACCAGGGAGTATTTAGGCTTA  
GGGTACTGAGATGTTTCACTTCCCCACGTTCCCTCCACACACCTATATATTCAGG  
TACGTCCTTCATCGGCTCCTGGTGCCAAGGCATCCACCGTGTGCCCTTAAAACTTG

ustom B" treatment included all probes listed here.

CCC CGC CGG GGC CG  
FC CTC GTT CAT GGG GA  
BC CCC GGA CAT CTA AG  
A GAG TCT CGT TCG TT  
BC CGG GTG AGG TTT CC  
GGT TTC CCG GGA GC  
ATT AAT GAA AAC A  
FTC CGA AAA CCA AC  
ACA CTC AGT TAA GA  
CA ACT TTA ATA TAC G  
G TCC TGT ATT GTT AT  
FCC CCG TTA CCC GT  
GT CAC CAA AGC CGC CG  
G GGG AGC GAC CAA A  
CAA CCA GGT T

GC

A

AG

G  
GG  
CCC  
TA

C

GC  
CG  
GCC  
AC  
CC  
CGG

GA

CTGGGT  
CTTAAA  
CTAAATG  
ATGGGA

GTGTCTCAGTTCCA  
TTGGTCTTGCGACGT  
TGCATGTGT

TCGT

G CAG TCC GAA CTG AGA

G CAG TCC GAA CTG GGA  
3 GAT TAC TAG CGA T  
CCC ACC TTC CTC CGG T  
A CAG CCA TGC ACC ACC  
TTG AGT TTC AAC  
G GTA TCT AAT CCT

3 AGG TCC GC  
CGG C

3A TGC ACC ACC TGT  
TCC CCA GGC GGG  
3 GCG AGC CCA TCC

3 CCG CGA CGG ATA  
AC ATC GAG GTG CCA  
3 CCC GAC TTT CGT  
3GA GGC GAC CGC  
CCA AAT CGT TAC G

3GG G  
3 TGG ACA GGA TTC TCA C

CTA GTT GTC T

CGG TCC TCC A

GA GAT GGT CCT  
GTG CGC CCT TAT TAA CTT AAC

GGGCTTC

TCTCC

TCGCTT

[
