# Supplementary material
Source: PubMed Central journal article supplement (PMC9266509)
Supplement: sj-pdf-3-vdi-10.1177_10406387221102430.pdf [file sj-pdf-3-vdi-10.1177_10406387221102430.pdf]

Supplemental Table 3. Raw data for each sample. AmPV = Avian metapneumovirus; IBDV = Infectious bursal disease virus; IBV = Infectious bronchitis virus; NDV = Newcastle disease virus. Highlighted read counts indicate samples/pathogens where near-complete (>80%) genomes were recovered.

| Sample_type_country    | Treatment | Total reads | Host % | Total viral reads per 100k | IBV reads per 100k | NDV reads per 100k | PicoRNAvirus reads per 100k | AmPV reads per 100k | IBDV reads per 100k | Rotavirus reads per 100k |
|------------------------|-----------|-------------|--------|----------------------------|--------------------|--------------------|-----------------------------|---------------------|---------------------|--------------------------|
| CA156_oral_Tanzania    | Untreated | 154,166     | 16.9   | 22                         | 21                 | 1                  | 0                           | 0                   | 0                   | 0                        |
|                        | Custom A  | 235,530     | 2.30   | 4,157                      | 4,660              | 107                | 0                           | 0                   | 0                   | 0                        |
|                        | MAMRibo   | 203,035     | 0.56   | 307                        | 300                | 0                  | 0                           | 0                   | 0                   | 0                        |
| CA169_oral_Tanzania    | Untreated | 112,475     | 2.02   | 11                         | 0                  | 0                  | 0                           | 0                   | 0                   | 0                        |
|                        | Custom A  | 191,578     | 0.6    | 0                          | 0                  | 0                  | 0                           | 0                   | 0                   | 0                        |
|                        | MAMRibo   | 150,952     | 0.1    | 0                          | 0                  | 0                  | 0                           | 0                   | 0                   | 0                        |
| CA172_oral_Tanzania    | Untreated | 139,207     | 0.1    | 0                          | 0                  | 0                  | 0                           | 0                   | 0                   | 0                        |
|                        | Custom A  | 188,145     | 0.7    | 0                          | 0                  | 0                  | 0                           | 0                   | 0                   | 0                        |
|                        | MAMRibo   | 155,804     | 4.1    | 0                          | 0                  | 0                  | 0                           | 0                   | 0                   | 0                        |
| CA196_oral_Tanzania    | Untreated | 152,756     | 0.5    | 81                         | 81                 | 0                  | 0                           | 0                   | 0                   | 0                        |
|                        | Custom A  | 182,607     | 0.3    | 24                         | 24                 | 0                  | 0                           | 0                   | 0                   | 0                        |
|                        | MAMRibo   | 155,433     | 1.7    | 1                          | 1                  | 0                  | 0                           | 0                   | 0                   | 0                        |
| IM09_oral_Tanzania     | Untreated | 142,387     | 23.3   | 1                          | 1                  | 0                  | 0                           | 0                   | 0                   | 0                        |
|                        | Custom A  | 143,923     | 0.47   | 1                          | 1                  | 0                  | 0                           | 0                   | 0                   | 0                        |
|                        | MAMRibo   | 155,490     | 0.22   | 2                          | 2                  | 0                  | 0                           | 0                   | 0                   | 0                        |
| IM14_oral_Tanzania     | Untreated | 194,238     | 0.8    | 1                          | 1                  | 0                  | 0                           | 0                   | 0                   | 0                        |
|                        | Custom A  | 228,283     | 5.6    | 51                         | 50                 | 1                  | 0                           | 0                   | 0                   | 0                        |
|                        | MAMRibo   | 182,731     | 0.59   | 2,586                      | 2,355              | 231                | 0                           | 0                   | 0                   | 0                        |
| IM59_oral_Tanzania     | Untreated | 292,925     | 0.19   | 314                        | 301                | 13                 | 0                           | 0                   | 0                   | 0                        |
|                        | Custom A  | 157,872     | 2.1    | 45                         | 44                 | 1                  | 0                           | 0                   | 0                   | 0                        |
|                        | MAMRibo   | 135,707     | 6.1    | 4                          | 3                  | 0                  | 0                           | 0                   | 0                   | 0                        |
| IM87_oral_Tanzania     | Untreated | 137,833     | 0.14   | 337                        | 337                | 0                  | 0                           | 0                   | 0                   | 0                        |
|                        | Custom A  | 221,779     | 0.12   | 152                        | 152                | 0                  | 0                           | 0                   | 0                   | 0                        |
|                        | MAMRibo   | 139,919     | 0.5    | 2                          | 2                  | 0                  | 0                           | 0                   | 0                   | 0                        |
| KD137_oral_Tanzania    | Untreated | 113,963     | 11.5   | 0                          | 0                  | 0                  | 0                           | 0                   | 0                   | 0                        |
|                        | Custom A  | 126,307     | 1.9    | 95                         | 94                 | 1                  | 0                           | 0                   | 0                   | 0                        |
|                        | MAMRibo   | 154,073     | 0.39   | 13                         | 13                 | 0                  | 0                           | 0                   | 0                   | 0                        |
| KD142_oral_Tanzania    | Untreated | 131,299     | 3.5    | 4                          | 4                  | 0                  | 0                           | 0                   | 0                   | 0                        |
|                        | Custom A  | 118,631     | 39     | 3                          | 3                  | 2                  | 0                           | 0                   | 0                   | 0                        |
|                        | MAMRibo   | 144,204     | 1.6    | 149                        | 35                 | 114                | 0                           | 0                   | 0                   | 0                        |
| KD152_oral_Tanzania    | Untreated | 146,089     | 2.6    | 161                        | 24                 | 137                | 0                           | 0                   | 0                   | 0                        |
|                        | Custom A  | 167,153     | 2.1    | 2                          | 0                  | 2                  | 0                           | 0                   | 0                   | 0                        |
|                        | MAMRibo   | 185,137     | 8      | 76                         | 76                 | 0                  | 0                           | 0                   | 0                   | 0                        |
| KD201_oral_Tanzania    | Untreated | 148,274     | 0.5    | 12,887                     | 12,880             | 7                  | 0                           | 0                   | 0                   | 0                        |
|                        | Custom A  | 194,382     | 0.15   | 1,567                      | 1,567              | 0                  | 0                           | 0                   | 0                   | 0                        |
|                        | MAMRibo   | 84,158      | 1.6    | 63                         | 63                 | 0                  | 0                           | 0                   | 0                   | 0                        |
| ME121_oral_Tanzania    | Untreated | 170,714     | 1.3    | 0                          | 0                  | 0                  | 0                           | 0                   | 0                   | 0                        |
|                        | Custom A  | 140,233     | 0.22   | 1                          | 1                  | 0                  | 0                           | 0                   | 0                   | 0                        |
|                        | MAMRibo   | 125,759     | 0.24   | 0                          | 0                  | 0                  | 0                           | 0                   | 0                   | 0                        |
| ME57_oral_Tanzania     | Untreated | 202,665     | 1.5    | 0                          | 0                  | 0                  | 0                           | 0                   | 0                   | 0                        |
|                        | Custom A  | 155,463     | 6      | 0                          | 0                  | 0                  | 0                           | 0                   | 0                   | 0                        |
|                        | MAMRibo   | 156,477     | 0.35   | 101                        | 88                 | 13                 | 0                           | 0                   | 0                   | 0                        |
| ME72_oral_Tanzania     | Untreated | 152,736     | 0.08   | 8                          | 7                  | 0                  | 0                           | 0                   | 0                   | 0                        |
|                        | Custom A  | 151,497     | 2.5    | 2                          | 2                  | 0                  | 0                           | 0                   | 0                   | 0                        |
|                        | MAMRibo   | 219,272     | 2.7    | 5                          | 5                  | 0                  | 0                           | 0                   | 0                   | 0                        |
| ME73_oral_Tanzania     | Untreated | 123,613     | 0.24   | 565                        | 0                  | 565                | 0                           | 0                   | 0                   | 0                        |
|                        | Custom A  | 178,558     | 0.02   | 189                        | 0                  | 189                | 0                           | 0                   | 0                   | 0                        |
|                        | MAMRibo   | 173,122     | 0.3    | 8                          | 0                  | 8                  | 0                           | 0                   | 0                   | 0                        |
| ME77_oral_Tanzania     | Untreated | 156,792     | 9.3    | 1                          | 1                  | 0                  | 0                           | 0                   | 0                   | 0                        |
|                        | Custom A  | 114,634     | 0.27   | 184                        | 3                  | 181                | 0                           | 0                   | 0                   | 0                        |
|                        | MAMRibo   | 151,384     | 0.08   | 15                         | 0                  | 15                 | 0                           | 0                   | 0                   | 0                        |
| MZ72_oral_Tanzania     | Untreated | 142,767     | 0.8    | 0                          | 0                  | 0                  | 0                           | 0                   | 0                   | 0                        |
|                        | Custom A  | 133,601     | 27.9   | 24                         | 23                 | 1                  | 0                           | 0                   | 0                   | 0                        |
|                        | MAMRibo   | 110,670     | 1.8    | 1,501                      | 1,500              | 1                  | 0                           | 0                   | 0                   | 0                        |
| MZ73_oral_Tanzania     | Untreated | 181,227     | 1.2    | 1,029                      | 1,028              | 1                  | 0                           | 0                   | 0                   | 0                        |
|                        | Custom A  | 102,542     | 2.8    | 0                          | 0                  | 0                  | 0                           | 0                   | 0                   | 0                        |
|                        | MAMRibo   | 120,598     | 0.5    | 5                          | 5                  | 0                  | 0                           | 0                   | 0                   | 0                        |
| MZ78_oral_Tanzania     | Untreated | 100,978     | 0.6    | 0                          | 0                  | 0                  | 0                           | 0                   | 0                   | 0                        |
|                        | Custom A  | 133,947     | 0.9    | 0                          | 0                  | 0                  | 0                           | 0                   | 0                   | 0                        |
|                        | MAMRibo   | 148,623     | 1.7    | 0                          | 0                  | 0                  | 0                           | 0                   | 0                   | 0                        |
| NT89_oral_Tanzania     | Untreated | 85,395      | 0.1    | 0                          | 0                  | 0                  | 0                           | 0                   | 0                   | 0                        |
|                        | Custom A  | 171,225     | 0.05   | 0                          | 0                  | 0                  | 0                           | 0                   | 0                   | 0                        |
|                        | MAMRibo   | 144,268     | 0.8    | 0                          | 0                  | 0                  | 0                           | 0                   | 0                   | 0                        |
| NT96_oral_Tanzania     | Untreated | 181,814     | 0.4    | 17                         | 17                 | 0                  | 0                           | 0                   | 0                   | 0                        |
|                        | Custom A  | 135,060     | 0.01   | 842                        | 842                | 0                  | 0                           | 0                   | 0                   | 0                        |
|                        | MAMRibo   | 175,980     | 0      | 321                        | 0                  | 321                | 0                           | 0                   | 0                   | 0                        |
| NT104_oral_Tanzania    | Untreated | 144,632     | 0.3    | 40                         | 40                 | 0                  | 0                           | 0                   | 0                   | 0                        |
|                        | Custom A  | 148,288     | 5.4    | 0                          | 0                  | 0                  | 0                           | 0                   | 0                   | 0                        |
|                        | MAMRibo   | 131,908     | 0.005  | 84                         | 84                 | 0                  | 0                           | 0                   | 0                   | 0                        |
| NT104_oral_Tanzania    | Untreated | 173,769     | 0      | 26                         | 25                 | 1                  | 0                           | 0                   | 0                   | 0                        |
|                        | Custom A  | 201,084     | 7      | 4                          | 3                  | 1                  | 0                           | 0                   | 0                   | 0                        |
|                        | MAMRibo   | 144,181     | 52.5   | 1                          | 1                  | 0                  | 0                           | 0                   | 0                   | 0                        |
| NT121_oral_Tanzania    | Untreated | 172,354     | 0.36   | 146                        | 7                  | 139                | 0                           | 0                   | 0                   | 0                        |
|                        | Custom A  | 123,294     | 0.18   | 19                         | 0                  | 19                 | 0                           | 0                   | 0                   | 0                        |
|                        | MAMRibo   | 194,263     | 3.4    | 1                          | 0                  | 1                  | 0                           | 0                   | 0                   | 0                        |
| B034_cloacal_Tanzania  | Untreated | 109,981     | 21     | 13                         | 13                 | 0                  | 0                           | 0                   | 0                   | 0                        |
|                        | Custom A  | 74,972      | 1.4    | 2,728                      | 2,570              | 0                  | 152                         | 0                   | 0                   | 0                        |
|                        | MAMRibo   | 160,393     | 1      | 892                        | 830                | 62                 | 0                           | 0                   | 0                   | 0                        |
| CA124_cloacal_Tanzania | Untreated | 162,923     | 2.6    | 7                          | 6                  | 0                  | 0                           | 0                   | 0                   | 0                        |
|                        | Custom A  | 349,920     | 77.4   | 0                          | 0                  | 0                  | 0                           | 0                   | 0                   | 0                        |
|                        | MAMRibo   | 369,955     | 14.9   | 0                          | 0                  | 0                  | 0                           | 0                   | 0                   | 0                        |
| M504_cloacal_Tanzania  | Untreated | 502,360     | 4.4    | 0                          | 0                  | 0                  | 0                           | 0                   | 0                   | 0                        |
|                        | Custom A  | 346,014     | 2.4    | 0                          | 0                  | 0                  | 0                           | 0                   | 0                   | 0                        |
|                        | MAMRibo   | 428,667     | 31.9   | 0                          | 0                  | 0                  | 0                           | 0                   | 0                   | 0                        |
| 1M14_cloacal_Tanzania  | Untreated | 272,185     | 4.5    | 0                          | 0                  | 0                  | 0                           | 0                   | 0                   | 0                        |
|                        | Custom B  | 435,404     | 2.2    | 0                          | 0                  | 0                  | 0                           | 0                   | 0                   | 0                        |
|                        | MAMRibo   | 233,410     | 0.2    | 0                          | 0                  | 0                  | 0                           | 0                   | 0                   | 0                        |
| M521_cloacal_Tanzania  | Untreated | 1,091,309   | 14     | 0                          | 0                  | 0                  | 0                           | 0                   | 0                   | 0                        |
|                        | Custom A  | 892,741     | 0.3    | 0                          | 0                  | 0                  | 0                           | 0                   | 0                   | 0                        |
|                        | MAMRibo   | 597,023     | 0.2    | 0                          | 0                  | 0                  | 0                           | 0                   | 0                   | 0                        |
| 1M20_cloacal_Tanzania  | Untreated | 508,968     | 0.1    | 0                          | 0                  | 0                  | 0                           | 0                   | 0                   | 0                        |
|                        | Custom A  | 383,930     | 6.6    | 0                          | 0                  | 0                  | 0                           | 0                   | 0                   | 0                        |
|                        | MAMRibo   | 132,786     | 33.7   | 0                          | 0                  | 0                  | 0                           | 0                   | 0                   | 0                        |
| B034_cloacal_Tanzania  | Untreated | 212,686     | 0.4    | 0                          | 0                  | 0                  | 0                           | 0                   | 0                   | 0                        |
|                        | Custom B  | 340,751     | 0.1    | 0                          | 0                  | 0                  | 0                           | 0                   | 0                   | 0                        |
|                        | MAMRibo   | 395,733     | 1.3    | 0                          | 0                  | 0                  | 0                           | 0                   | 0                   | 0                        |
| B066_cloacal_Tanzania  | Untreated | 483,917     | 0      | 0                          | 0                  | 0                  | 0                           | 0                   | 0                   | 0                        |
|                        | Custom B  | 88,684      | 0      | 0                          | 0                  | 0                  | 0                           | 0                   | 0                   | 0                        |
|                        | MAMRibo   | 478,415     | 0      | 0                          | 0                  | 0                  | 0                           | 0                   | 0                   | 0                        |
| B090_cloacal_Tanzania  | Untreated | 306,125     | 1.1    | 0                          | 0                  | 0                  | 0                           | 0                   | 0                   | 0                        |
|                        | Custom B  | 148,067     | 28.1   | 1,053                      | 0                  | 1,053              | 0                           | 0                   | 0                   | 0                        |
|                        | MAMRibo   | 285,328     | 0.1    | 8                          | 8                  | 0                  | 0                           | 0                   | 0                   | 0                        |
| B090_cloacal_Tanzania  | Untreated | 370,506     | 0.1    | 0                          | 0                  | 0                  | 0                           | 0                   | 0                   | 0                        |
|                        | Custom B  | 406,844     | 46.1   | 0                          | 0                  | 0                  | 0                           | 0                   | 0                   | 0                        |
|                        | MAMRibo   | 197,053     | 37.7   | 0                          | 0                  | 0                  | 0                           | 0                   | 0                   | 0                        |
| B040_cloacal_Tanzania  | Untreated | 593,384     | 0.7    | 0                          | 0                  | 0                  | 0                           | 0                   | 0                   | 0                        |
|                        | Custom B  | 55,736      | 0.7    | 0                          | 0                  | 0                  | 0                           | 0                   | 0                   | 0                        |
|                        | MAMRibo   | 534,381     | 16.9   | 2                          | 0                  | 2                  | 0                           | 0                   | 0                   | 0                        |
| B066_cloacal_Tanzania  | Untreated | 98,108      | 40     | 662                        | 0                  | 662                | 0                           | 0                   | 0                   | 0                        |
|                        | Custom B  | 291,217     | 0.7    | 16                         | 16                 | 0                  | 0                           | 0                   | 0                   | 0                        |
|                        | MAMRibo   | 331,409     | 0.5    | 5                          | 5                  | 0                  | 0                           | 0                   | 0                   | 0                        |
| B090_cloacal_Tanzania  | Untreated | 352,852     | 0.5    | 0                          | 0                  | 0                  | 0                           | 0                   | 0                   | 0                        |
|                        | Custom B  | 138,973     | 37.8   | 0                          | 0                  | 0                  | 0                           | 0                   | 0                   | 0                        |
|                        | MAMRibo   | 251,055     | 0.2    | 0                          | 0                  | 0                  | 0                           | 0                   | 0                   | 0                        |
| B090_cloacal_Tanzania  | Untreated | 528,430     | 0      | 0                          | 0                  | 0                  | 0                           | 0                   | 0                   | 0                        |
|                        | Custom B  | 478,401     | 66.6   | 0                          | 0                  | 0                  | 0                           | 0                   | 0                   | 0                        |
|                        | MAMRibo   | 112,061     | 47.5   | 0                          | 0                  | 0                  | 0                           | 0                   | 0                   | 0                        |
| B090_cloacal_Tanzania  | Untreated | 414,397     | 4.3    | 0                          | 0                  | 0                  | 0                           | 0                   | 0                   | 0                        |
|                        | Custom B  | 194,887     | 1      | 0                          | 0                  | 0                  | 0                           | 0                   | 0                   | 0                        |
|                        | MAMRibo   | 377,952     | 15     | 0                          | 0                  | 0                  | 0                           | 0                   | 0                   | 0                        |
| CA14_cloacal_Tanzania  | Untreated | 134,506     | 43.1   | 0                          | 0                  | 0                  | 0                           | 0                   | 0                   | 0                        |
|                        | Custom B  | 593,384     | 1.4    | 0                          | 0                  | 0                  | 0                           | 0                   | 0                   | 0                        |
|                        | MAMRibo   | 252,168     | 0.4    | 0                          | 0                  | 0                  | 0                           | 0                   | 0                   | 0                        |
| M540_cloacal_Tanzania  | Untreated | 252,125     | 0.3    | 0                          | 0                  | 0                  | 0                           | 0                   | 0                   | 0                        |
|                        | Custom B  | 406,154     | 3.2    | 0                          | 0                  | 0                  | 0                           | 0                   | 0                   | 0                        |
|                        | MAMRibo   | 227,045     | 44     | 0                          | 0                  | 0                  | 0                           | 0                   | 0                   | 0                        |
| M573_cloacal_Tanzania  | Untreated | 795,204     | 1.3    | 0                          | 0                  | 0                  | 0                           | 0                   | 0                   | 0                        |
|                        | Custom B  | 291,632     | 0.3    | 0                          | 0                  | 0                  | 0                           | 0                   | 0                   | 0                        |
|                        | MAMRibo   | 413,858     | 0.3    | 0                          | 0                  | 0                  | 0                           |                     |                     |                          |

|                          |           |         |      |        |        |    |        |   |        |   |     |
|--------------------------|-----------|---------|------|--------|--------|----|--------|---|--------|---|-----|
|                          | CXribo    | 283,691 | 1    | 46     | 0      | 46 | 0      | 0 | 0      | 0 | 0   |
| SM97_cloaca_Tanzania     | Untreated | 443,532 | 62.2 | 0      | 0      | 0  | 0      | 0 | 0      | 0 | 0   |
|                          | Custom B  | 65,939  | 45.7 | 0      | 0      | 0  | 0      | 0 | 0      | 0 | 0   |
|                          | MAMribo   | 210,084 | 2.6  | 0      | 0      | 0  | 0      | 0 | 0      | 0 | 0   |
|                          | CXribo    | 259,362 | 0.1  | 0      | 0      | 0  | 0      | 0 | 0      | 0 | 0   |
| 2306_trachea_Guatemala   | Untreated | 456,558 | 52.5 | 5      | 0      | 0  | 0      | 0 | 5      | 0 | 0   |
|                          | Custom B  | 438,132 | 84   | 119    | 5      | 0  | 0      | 0 | 114    | 0 | 0   |
| 2308_bursa_Peru          | Untreated | 194,979 | 97.4 | 4      | 0      | 0  | 1      | 0 | 3      | 0 | 0   |
|                          | Custom B  | 704,536 | 66.4 | 9,113  | 0      | 0  | 1,824  | 0 | 7,289  | 0 | 0   |
| 2309_bursa_Peru          | Untreated | 152,909 | 98.7 | 2      | 0      | 0  | 0      | 0 | 2      | 0 | 0   |
|                          | Custom B  | 363,045 | 61.5 | 3,520  | 0      | 0  | 0      | 0 | 3,520  | 0 | 0   |
| 2310_bursa_Peru          | Untreated | 230,223 | 98.5 | 40     | 0      | 0  | 3      | 0 | 37     | 0 | 0   |
|                          | Custom B  | 885,635 | 63.1 | 24,424 | 0      | 0  | 753    | 0 | 23,671 | 0 | 0   |
| 2314_choana_Mexico       | Untreated | 616,571 | 0.1  | 10     | 0      | 0  | 0      | 0 | 0      | 0 | 0   |
|                          | Custom B  | 400,780 | 0.7  | 19,184 | 0      | 0  | 0      | 0 | 0      | 0 | 0   |
| 2316_cloaca_Mexico       | Untreated | 474,151 | 0.9  | 2      | 1      | 0  | 1      | 0 | 0      | 0 | 0   |
|                          | Custom B  | 376,950 | 7.7  | 288    | 125    | 0  | 163    | 0 | 0      | 0 | 0   |
| 2318_cloaca_Mexico       | Untreated | 572,238 | 0.1  | 1      | 0      | 0  | 1      | 0 | 1      | 0 | 0   |
|                          | Custom B  | 358,377 | 1.9  | 593    | 0      | 0  | 593    | 0 | 0      | 0 | 0   |
| 2321_choanal_Mexico      | Untreated | 309,551 | 90.7 | 6      | 6      | 0  | 0      | 0 | 0      | 0 | 0   |
|                          | Custom B  | 459,765 | 41.8 | 9,687  | 9,600  | 0  | 87     | 0 | 0      | 0 | 0   |
| 2322_spleen/bursa_Mexico | Untreated | 213,085 | 86.2 | 1      | 0      | 0  | 1      | 0 | 0      | 0 | 0   |
|                          | Custom B  | 458,726 | 24   | 2,106  | 198    | 0  | 1,908  | 0 | 0      | 0 | 0   |
| 2324_spleen/bursa_Mexico | Untreated | 345,291 | 91.9 | 5      | 0      | 0  | 1      | 0 | 4      | 0 | 0   |
|                          | Custom B  | 409,801 | 39.2 | 8,569  | 0      | 0  | 109    | 0 | 8,460  | 0 | 0   |
| 2328_cloaca_Mexico       | Untreated | 383,046 | 17.5 | 1      | 0      | 0  | 1      | 0 | 0      | 0 | 0   |
|                          | Custom B  | 479,897 | 8    | 349    | 38     | 0  | 311    | 0 | 0      | 0 | 0   |
| 2332_choanal/lung_Mexico | Untreated | 184,406 | 98.2 | 0      | 0      | 0  | 0      | 0 | 0      | 0 | 0   |
|                          | Custom B  | 329,480 | 44.2 | 177    | 113    | 0  | 64     | 0 | 0      | 0 | 0   |
| 2333_spleen/bursa_Mexico | Untreated | 162,403 | 90.4 | 24     | 0      | 0  | 24     | 0 | 0      | 0 | 0   |
|                          | Custom B  | 401,927 | 13.7 | 22,072 | 0      | 0  | 22,072 | 0 | 0      | 0 | 0   |
| 2334_choanal/lung_Mexico | Untreated | 235,644 | 92   | 26     | 26     | 0  | 0      | 0 | 0      | 0 | 0   |
|                          | Custom B  | 315,464 | 63.6 | 11,247 | 8      | 0  | 0      | 0 | 0      | 0 | 0   |
| 2335_spleen/bursa_Mexico | Untreated | 272,404 | 81.4 | 5      | 0      | 0  | 2      | 0 | 0      | 0 | 0   |
|                          | Custom B  | 367,819 | 50.3 | 12,204 | 8,153  | 0  | 4,051  | 0 | 0      | 0 | 0   |
| 2336_choanal/lung_Mexico | Untreated | 181,888 | 95.9 | 117    | 0      | 0  | 0      | 0 | 0      | 0 | 0   |
|                          | Custom B  | 319,268 | 25.4 | 42,986 | 0      | 0  | 0      | 0 | 0      | 0 | 0   |
| 2337_spleen/bursa_Mexico | Untreated | 417,682 | 99.1 | 4      | 0      | 0  | 0      | 0 | 3      | 0 | 0   |
|                          | Custom B  | 333,678 | 58.7 | 4,535  | 257    | 0  | 0      | 0 | 4,278  | 0 | 0   |
| 2338_choanal/lung_Mexico | Untreated | 333,362 | 52.2 | 1      | 0      | 0  | 1      | 0 | 0      | 0 | 0   |
|                          | Custom B  | 425,292 | 9    | 99     | 0      | 0  | 99     | 0 | 0      | 0 | 0   |
| 2339_choanal/lung_Mexico | Untreated | 126,825 | 51.6 | 95     | 94     | 0  | 1      | 0 | 0      | 0 | 0   |
|                          | Custom B  | 365,073 | 13.7 | 34,462 | 34,408 | 0  | 54     | 0 | 0      | 0 | 0   |
| 2340_choanal/lung_Mexico | Untreated | 208,744 | 87.5 | 0      | 0      | 0  | 0      | 0 | 0      | 0 | 0   |
|                          | Custom B  | 451,699 | 71.8 | 102    | 0      | 0  | 0      | 0 | 0      | 0 | 102 |
| 2341_spleen/bursa_Mexico | Untreated | 255,910 | 86.8 | 3      | 2      | 0  | 1      | 0 | 0      | 0 | 0   |
|                          | Custom B  | 381,024 | 41.3 | 9,788  | 6,105  | 0  | 3,683  | 0 | 0      | 0 | 0   |
| 2343_spleen/bursa_Mexico | Untreated | 262,130 | 34.6 | 0      | 0      | 0  | 1      | 0 | 0      | 0 | 0   |
|                          | Custom B  | 227,018 | 12.2 | 9,269  | 0      | 0  | 9,269  | 0 | 0      | 0 | 0   |
| 2344_choanal/lung_Mexico | Untreated | 284,668 | 6.1  | 11     | 0      | 0  | 0      | 0 | 0      | 0 | 0   |
|                          | Custom B  | 451,042 | 9.4  | 15,678 | 15,678 | 0  | 0      | 0 | 0      | 0 | 0   |
| 2345_spleen/bursa_Mexico | Untreated | 102,692 | 35.5 | 0      | 0      | 0  | 0      | 0 | 0      | 0 | 0   |
|                          | Custom B  | 428,986 | 47.8 | 157    | 126    | 0  | 31     | 0 | 0      | 0 | 0   |
| 2346_choanal/lung_Mexico | Untreated | 313,277 | 17.1 | 8      | 8      | 0  | 0      | 0 | 0      | 0 | 0   |
|                          | Custom B  | 543,495 | 5.8  | 40,358 | 40,358 | 0  | 0      | 0 | 0      | 0 | 0   |
| 2347_spleen/bursa_Mexico | Untreated | 207,724 | 32.1 | 1      | 0      | 0  | 1      | 0 | 0      | 0 | 0   |
|                          | Custom B  | 530,042 | 25.4 | 6,025  | 6,005  | 0  | 20     | 0 | 0      | 0 | 0   |
| 2348_choanal/lung_Mexico | Untreated | 170,714 | 93.7 | 6      | 5      | 1  | 0      | 0 | 0      | 0 | 0   |
|                          | Custom B  | 309,125 | 39.4 | 1,039  | 890    | 76 | 73     | 0 | 0      | 0 | 0   |
| 2349_spleen/bursa/Mexico | Untreated | 236,046 | 95.3 | 2      | 0      | 0  | 2      | 0 | 0      | 0 | 0   |
|                          | Custom B  | 329,315 | 41.8 | 36,823 | 139    | 0  | 36,684 | 0 | 0      | 0 | 0   |
